# Supplementary material for: Anisotropic Müller glial scaffolding supports a multiplex lattice mosaic of photoreceptors in zebrafish retina
Source: PubMed Central journal article supplement (PMC5688757; doi:10.1186/s13064-017-0096-z), 2017-11-15
Supplement: 13064_2017_96_MOESM2_ESM.pdf [file 13064_2017_96_MOESM2_ESM.pdf]

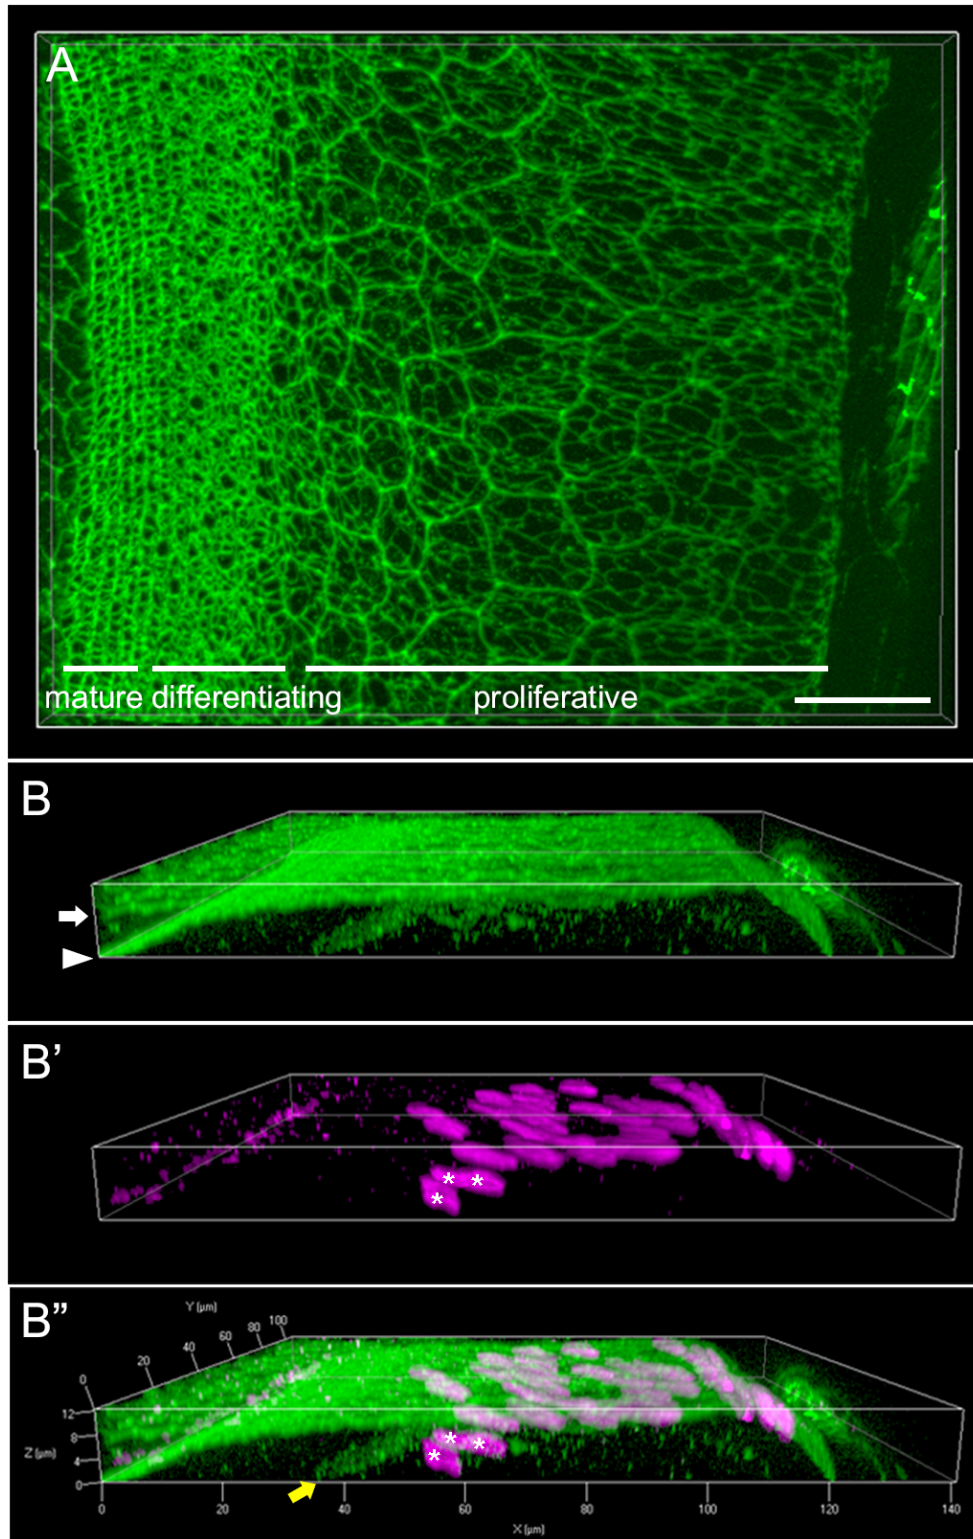

Figure S1

**Figure S1. Maximum intensity z-projection and lateral slice view of retinal margin illustrating shape and position of mitotic figures. (A) Snap shot from a 3D-**

reconstruction of the retinal margin and retinal pigmented epithelium (RPE) in a flat-mount preparation immunostained for ZO1 (green). The front of the eye is to the right.

Proliferative, differentiating (pre-column), and differentiated (mature mosaic) zones of the retina are labeled. (B-B'') Lateral view (xz plane) of ZO1 (green) and the mitotic marker, pH3 (magenta). (B) The RPE (arrow) and neural retinal epithelium (arrowhead) are separate but closely apposed, especially in the proliferative zone. (B') The pH3+ mitotic cells are tilted with respect to the surface of the retinal epithelium, and the resultant parallax precludes identifying the profiles of pH3+ mitotic cells in the ZO1 channel in a maximum intensity z-projection (*e.g.*, Fig. 1G'). (B'') Proliferating endothelial cells in the circumferential blood vessel (yellow arrow) of the vitreous circulation, which lies below the retinal germinal zone [1], are also pH3+ (asterisks). Scale bar: 20  $\mu\text{m}$  (A).

1. Raymond PA, Barthel LK, Bernardos RL, Perkowski JJ. Molecular characterization of retinal stem cells and their niches in adult zebrafish. *BMC Dev Biol.* 2006;6:36.

<http://dx.doi.org/10.1186/1471-213X-6-36>
