# Supplementary material for: Anisotropic Müller glial scaffolding supports a multiplex lattice mosaic of photoreceptors in zebrafish retina
Source: PubMed Central journal article supplement (PMC5688757; doi:10.1186/s13064-017-0096-z), 2017-11-15
Supplement: 13064_2017_96_MOESM7_ESM.pdf [file 13064_2017_96_MOESM7_ESM.pdf]

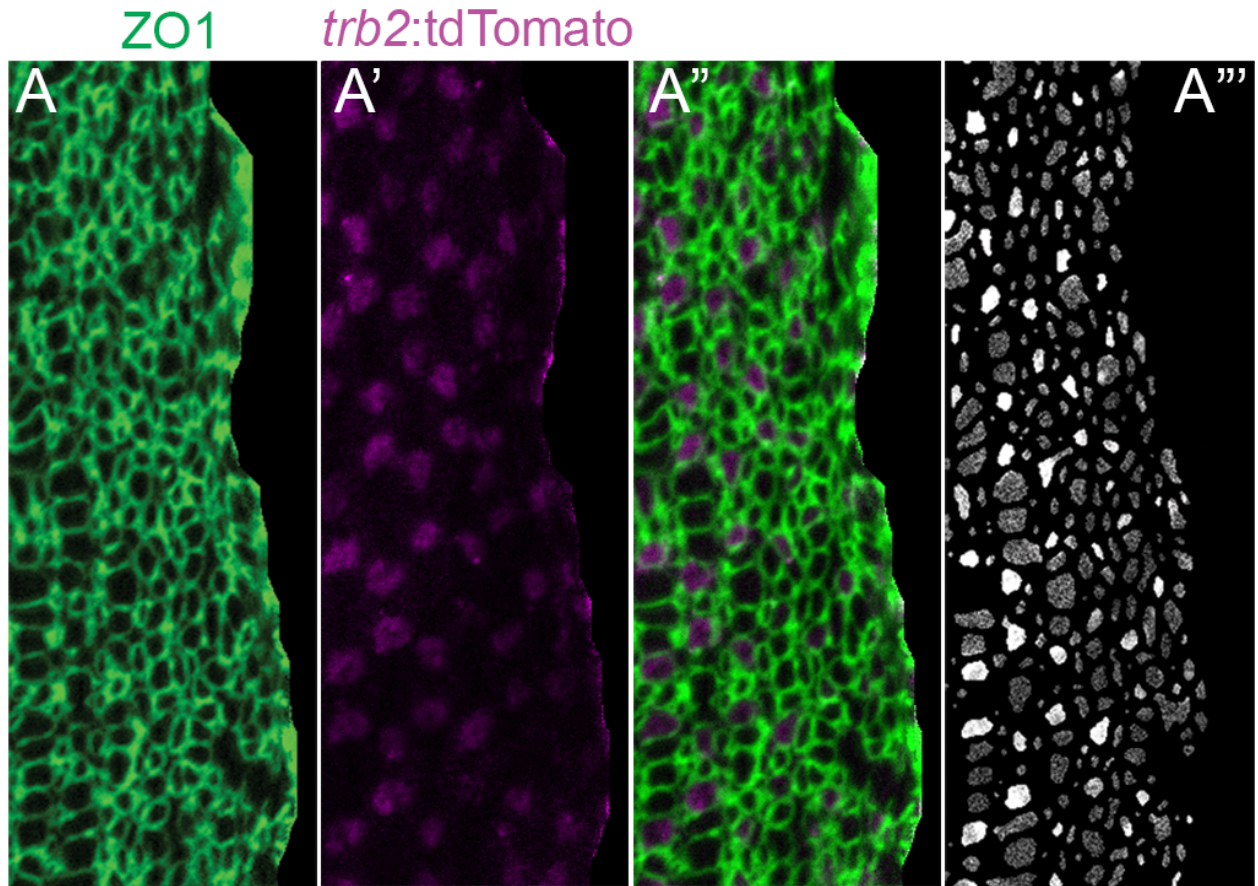

Figure S4

**Figure S4. Segmentation and classification of photoreceptor profiles.** Selective projection of ZO1-labeled cell profiles (A, A'') and *trb2:tdTomato*+ Red cones (A', A'') in the pre-column zone of a retinal flat-mount. Panel A''' shows the tdTomato signal intensity at the level of the segmented ZO-1-labeled cell profiles, which was used for the automated classification and counting procedure described in the Materials and Methods.
