# Supplementary material for: Anisotropic Müller glial scaffolding supports a multiplex lattice mosaic of photoreceptors in zebrafish retina
Source: PubMed Central journal article supplement (PMC5688757; doi:10.1186/s13064-017-0096-z), 2017-11-15
Supplement: 13064_2017_96_MOESM8_ESM.pdf [file 13064_2017_96_MOESM8_ESM.pdf]

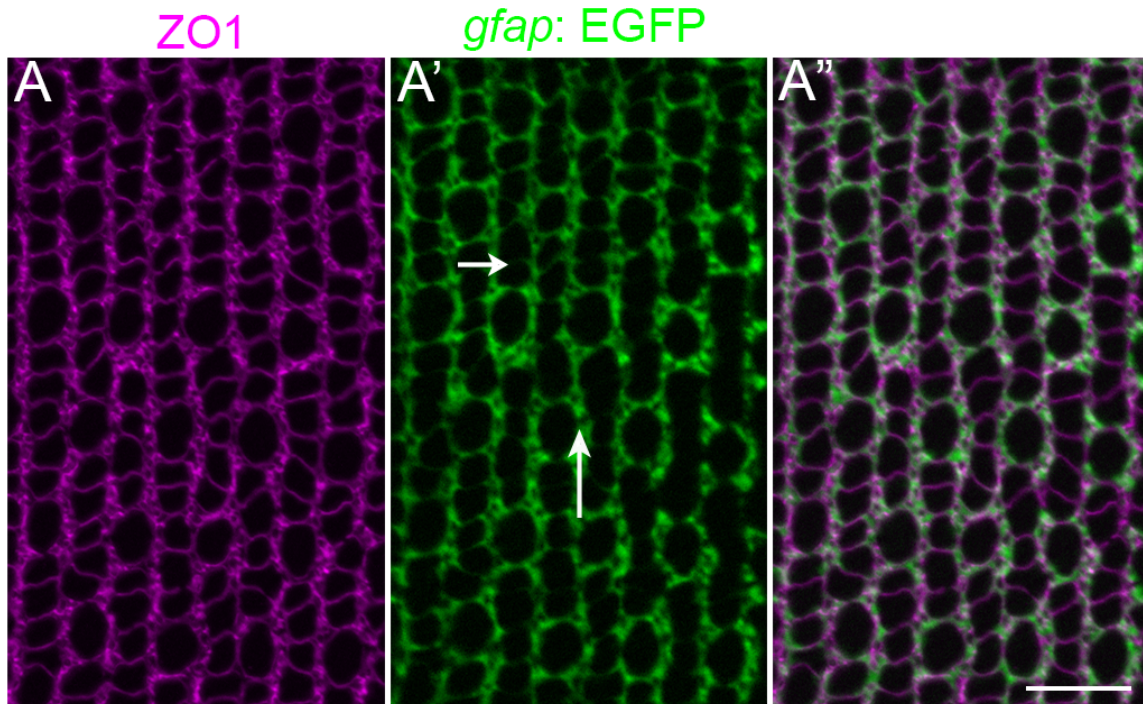

Figure S5

**Figure S5. Müller glial apical processes are preferentially distributed into parallel, inter-column bands.** (A-A'') Retinal flat-mount immunocytochemistry for ZO1 (magenta) in the Müller glial transgenic reporter line, *Tg(gfap:EGFP)*. Müller glial processes (GFP+) completely surround the profiles of individual rods and cones, forming relatively thin intra-column lamellae (short arrow), and thicker inter-column expansions (long arrow). Refer to Fig 1 A and B for a description of columns. Scale bar: 10  $\mu\text{m}$ .
